# Supplementary material for: Prognostic value of respiratory compliance course on mortality in COVID-19 patients with vv-ECMO
Source: Springer Nature journal article supplement (doi:10.1186/s13613-023-01152-7), 2023-06-21
Supplement: MOESM1 [file 13613_2023_1152_MOESM1_ESM.pdf]

# **Prognostic value of respiratory compliance course on mortality in COVID-19 patients with vv-ECMO**

## **Additional file**

## **METHODS**

### vv-ECMO implantation process

vv-ECMO cannulation was performed locally for patients primarily admitted to the ICUs or, for non-transportable patients in peripheral hospital, by mobile ECMO retrieval teams. These teams were available 24 hours a day and 7 days a week. All implantations were percutaneously ultrasonography-guided, with a venous drainage cannula (from 23 to 29 Fr) inserted *via* the femoral vein, and a return cannula (from 17 to 19 Fr) inserted *via* the right jugular vein. Proper positions of cannula tips were checked on a post-implantation chest X-Ray or by ultrasound. Sufficient distance between tips of the cannulas was ensured to avoid excessive recirculation.

### Initial management

The PEEP level on ECMO was systematically personalized by different techniques, depending on device availabilities. Three techniques were used for PEEP titration: esophageal pressure, electrical impedance tomography and alveolar opening pressure. This allowed us to identify the optimal PEEP for each patient to obtain the best Crs.

Sedation was managed to target a Richmond Agitation-Sedation Scale score of -4 / -5 assessed every 4 hours. Neuromuscular blocker agents were used systematically during the first 48 hours after vv-ECMO initiation and the decision to pursue them was left at intensivist discretion.

### Coagulation management

Continuous infusion of unfractionated heparin was started immediately after vv-ECMO implantation and an anti-Xa at 0.2-0.6 was targeted and checked every day. Transfusion was performed when hemoglobin was lower than 7 g/dl in case of SaO<sub>2</sub> remained below 90% to optimize oxygen delivery. Platelet transfusions were discouraged except in case of severe bleeding or if platelets were lower than 20 G/l. Fibrinogen level was maintained above 1.5 g/L.

#### vv-ECMO weaning

Assessment for weaning was performed daily after the first 48h. First, the weaning process was only initiated in patients presenting a significant improvement in Crs defined by a V<sub>T</sub> at 6-7 mL/kg of ideal body weight with a PEEP lower than 12 cmH<sub>2</sub>O resulted in a P<sub>plat</sub> lower than 27 cmH<sub>2</sub>O with FiO<sub>2</sub> lower or equal to 60%. Then, the weaning process started by switching off ECMO sweep gas flow and maintaining a minimum ECMO flow upper than 3L/min. For patients with a body mass index (BMI) greater than 35 kg/m<sup>2</sup>, the P<sub>plat</sub> target was lower than 35 cmH<sub>2</sub>O. The arterial oxygenation and decarboxylation (generally PaO<sub>2</sub> greater than 65 – 70 mmHg and PaCO<sub>2</sub> lower than 45 – 50 mmHg) were checked at three, six and twelve hours during the trial.

#### *Withdrawal of care management*

ECMO stopping rules were based on clinical and radiological factors: Clinically, a lack of a significant respiratory improvement over time (Crs for instance, persistent hypoxemia or hypercapnia at repeated ECMO weaning trials). Deterioration of the patient's general condition was also a major factor. When needed, i.e. in most cases, a chest computed tomography was performed to ensure the unfavorable evolution of the parenchymal involvement with radiological signs of pulmonary fibrosis (traction bronchiectasis and/or reticulations). Specifically, in France, the rules of withdrawal are regulated (Law Clays Leonetti N°2016-87). Thus, any withdrawal of care can be decided only after gaining a consensus between medical, paramedical teams and the relatives. Moreover, a second expert opinion, independent from the team in charge must be documented in the record.

## Statistical analysis

To determine factors associated with the primary outcome, a time-dependent analysis has been performed. The strength of this specific Cox model relies on the integration of within-individual time variation of the covariate to predict individual response at each time interval when the covariate varies. In other words, in a survival analysis, time-varying covariates are covariates whose value can change during follow-up. In our manuscript,  $C_{RS}$ , for instance, is a time-dependent covariate and considering its variation over time improves the accuracy of the prediction compared to a unique value at a specific time. Variables included were chosen on literature and were *a priori* discussed among authors. Thus, the variable “corticosteroids for COVID-19” was not included as no patient received them during the first wave of the pandemic. “ $PaO_2/FiO_2$ ” variable was also not included as a direct consequence of the vv-ECMO settings. “ $\Delta P$ ” as a target variable in the ventilatory management below 15 cmH<sub>2</sub>O and thus “PEEP” and “ $P_{plat}$ ” were also not included. All remaining parameters with a p value <0.1 were included in the multivariate time-dependant model. To build the multivariate time-dependent cox model, a forward stepwise selection of the variables was used. The Null model included  $C_{rs}$  time-dependent variable from day one to day ten. Log-linearity for continuous variables, Schoenfeld residuals and variance inflation factors for multicollinearity were checked.



Table S1: Ventilatory characteristics before and after vv-ECMO implantation in patients with available data on the 2 timepoints

| variable                              | N available | before ECMO        | N available | day 1 after ECMO   | p       |
|---------------------------------------|-------------|--------------------|-------------|--------------------|---------|
| Respiratory rate (c/min)              | 90          | 28 (26 - 30)       | 90          | 12 (10 - 15)       | <0.0001 |
| Tidal volume (ml/kg)                  | 100         | 6 (5 - 6)          | 100         | 3 (2 - 4)          | <0.0001 |
| Crs (ml/cmH <sub>2</sub> O)           | 97          | 23.2 (17.9 - 28.6) | 97          | 15.0 (10.0 - 21.4) | <0.0001 |
| Plateau pressure (cmH <sub>2</sub> O) | 87          | 28 (25 - 32)       | 87          | 25 (22 - 27)       | <0.0001 |
| PEEP (cmH <sub>2</sub> O)             | 104         | 12 (9 - 14)        | 104         | 12 (10 - 15)       | 0.0116  |
| Driving pressure (cmH <sub>2</sub> O) | 87          | 17 (15 - 20)       | 87          | 12 (9 - 14)        | <0.0001 |

*Values are expressed as median [IQR].*

*ECMO: extracorporeal membrane oxygenation; PEEP: positive end-expiratory pressure;*

*srC: static respiratory compliance.*

Table S2: Baseline characteristics according to waves

| variable                                           | N   | Global population | N  | Wave 1       | N  | Wave 2       | N  | Wave 3       | N  | Wave 4       | p       |
|----------------------------------------------------|-----|-------------------|----|--------------|----|--------------|----|--------------|----|--------------|---------|
| <b>Demographics</b>                                |     |                   |    |              |    |              |    |              |    |              |         |
| Age (years)                                        | 122 | 59 (52 - 64)      | 23 | 54 (46 - 62) | 25 | 63 (61 - 66) | 53 | 58 (50 - 64) | 21 | 58 (51 - 62) | 0.003   |
| Male gender                                        | 122 | 83 (68 %)         | 23 | 19 (83 %)    | 25 | 18 (72 %)    | 53 | 34 (64 %)    | 21 | 12 (57 %)    | 0.27    |
| Body mass index (Kg/m <sup>2</sup> )               | 122 | 33 (28 - 37)      | 23 | 33 (28 - 36) | 25 | 32 (26 - 37) | 53 | 32 (29 - 36) | 21 | 34 (31 - 39) | 0.38    |
| <b>Medical History</b>                             |     |                   |    |              |    |              |    |              |    |              |         |
| Hypertension                                       | 122 | 60 (49 %)         | 23 | 7 (30 %)     | 25 | 14 (56 %)    | 53 | 25 (47 %)    | 21 | 14 (67 %)    | 0.096   |
| Diabetes mellitus                                  | 122 | 30 (25 %)         | 23 | 7 (30 %)     | 25 | 4 (16 %)     | 53 | 10 (19 %)    | 21 | 9 (43 %)     | 0.11    |
| Cardiac disease                                    | 122 | 11 (9 %)          | 23 | 3 (13 %)     | 25 | 1 (4 %)      | 53 | 6 (11 %)     | 21 | 1 (5 %)      | 0.65    |
| Lung disease                                       | 122 | 29 (24 %)         | 23 | 3 (13 %)     | 25 | 6 (24 %)     | 53 | 15 (28 %)    | 21 | 5 (24 %)     | 0.57    |
| Renal disease                                      | 122 | 10 (8 %)          | 23 | 0 (0 %)      | 25 | 2 (8 %)      | 53 | 4 (8 %)      | 21 | 4 (19 %)     | 0.14    |
| Immunosuppression                                  | 122 | 15 (12 %)         | 23 | 2 (9 %)      | 25 | 2 (8 %)      | 53 | 7 (13 %)     | 21 | 4 (19 %)     | 0.69    |
| <b>Pre-ECMO management</b>                         |     |                   |    |              |    |              |    |              |    |              |         |
| SAPS2 score                                        | 122 | 43 (34 - 55)      | 23 | 44 (34 - 62) | 25 | 41 (32 - 51) | 53 | 41 (34 - 46) | 21 | 55 (40 - 63) | 0.100   |
| Delay between first symptoms to ECMO (days)        | 109 | 16 (10 - 21)      | 22 | 9 (7 - 14)   | 20 | 18 (14 - 24) | 49 | 17 (12 - 21) | 18 | 14 (8 - 24)  | 0.005   |
| Mechanical ventilation duration before ECMO (days) | 122 | 4 (1 - 9)         | 23 | 4 (2 - 7)    | 25 | 8 (2 - 11)   | 53 | 4 (1 - 9)    | 21 | 3 (1 - 7)    | 0.11    |
| Corticosteroids for COVID-19                       | 122 | 85 (70 %)         | 23 | 1 (4 %)      | 25 | 18 (72 %)    | 53 | 48 (91 %)    | 21 | 18 (86 %)    | <0.0001 |
| Tocilizumab for COVID-19                           | 122 | 16 (13 %)         | 23 | 2 (9 %)      | 25 | 3 (12 %)     | 53 | 8 (15 %)     | 21 | 3 (14 %)     | 0.94    |
| Prone positioning                                  | 122 | 117 (96 %)        | 23 | 23 (100 %)   | 25 | 24 (96 %)    | 53 | 50 (94 %)    | 21 | 20 (95 %)    | 0.85    |
| Mobile ECMO assistance                             | 122 | 67 (55 %)         | 23 | 8 (35 %)     | 25 | 19 (76 %)    | 53 | 27 (51 %)    | 21 | 13 (62 %)    | 0.029   |

| variable                                       | N   | Global population | N  | Wave 1          | N  | Wave 2          | N  | Wave 3          | N  | Wave 4          | p      |
|------------------------------------------------|-----|-------------------|----|-----------------|----|-----------------|----|-----------------|----|-----------------|--------|
| Ventilator acquired pneumonia                  | 122 | 72 (59 %)         | 23 | 9 (39 %)        | 25 | 20 (80 %)       | 53 | 27 (51 %)       | 21 | 16 (76 %)       | 0.006  |
| <b>day 1 parameters</b>                        |     |                   |    |                 |    |                 |    |                 |    |                 |        |
| Lactate (mmol/l)                               | 119 | 1.4 (1.0 - 2.1)   | 23 | 1.6 (1.3 - 2.2) | 25 | 1.3 (1.1 - 1.9) | 51 | 1.4 (0.9 - 2.0) | 20 | 1.4 (0.9 - 2.6) | 0.72   |
| PaO <sub>2</sub> /iFO <sub>2</sub>             | 122 | 134 (93 - 175)    | 23 | 125 (90 - 172)  | 25 | 111 (73 - 150)  | 53 | 133 (99 - 162)  | 21 | 156 (125 - 204) | 0.095  |
| Respiratory Rate (c/min)                       | 119 | 12 (10 - 15)      | 22 | 12 (10 - 15)    | 23 | 12 (10 - 15)    | 53 | 10 (10 - 12)    | 21 | 12 (12 - 15)    | 0.17   |
| Tidal volume (ml/kg)                           | 119 | 2.8 (2.0 - 3.5)   | 22 | 3.1 (2.5 - 3.9) | 23 | 2.2 (1.8 - 2.8) | 53 | 2.5 (1.9 - 3.3) | 21 | 3.7 (2.0 - 3.9) | 0.009  |
| Crs (ml/cmH <sub>2</sub> O)                    | 116 | 15 (10 - 22)      | 19 | 20 (15 - 29)    | 25 | 13 (10 - 20)    | 51 | 13 (9 - 21)     | 21 | 18 (11 - 27)    | 0.038  |
| Plateau pressure (cmH <sub>2</sub> O)          | 114 | 24 (22 - 26)      | 18 | 24 (21 - 26)    | 25 | 24 (22 - 25)    | 50 | 25 (22 - 27)    | 21 | 24 (23 - 26)    | 0.90   |
| PEEP (cmH <sub>2</sub> O)                      | 121 | 12 (10 - 15)      | 22 | 14 (12 - 15)    | 25 | 12 (10 - 14)    | 53 | 12 (10 - 14)    | 21 | 12 (10 - 15)    | 0.20   |
| Driving pressure (cmH <sub>2</sub> O)          | 114 | 12 (10 - 15)      | 18 | 11 (10 - 13)    | 25 | 13 (10 - 15)    | 50 | 12 (10 - 14)    | 21 | 11 (10 - 15)    | 0.69   |
| Early right ventricular failure                | 122 | 9 (7 %)           | 23 | 1 (4 %)         | 25 | 2 (8 %)         | 53 | 5 (9 %)         | 21 | 1 (5 %)         | 0.93   |
| <b>Outcomes</b>                                |     |                   |    |                 |    |                 |    |                 |    |                 |        |
| Steroid for prolonged ARDS                     | 122 | 82 (67 %)         | 23 | 9 (39 %)        | 25 | 21 (84 %)       | 53 | 40 (75 %)       | 21 | 12 (57 %)       | 0.003  |
| Vasopressors (day one to day ten, yes/no)      | 122 | 83 (68 %)         | 23 | 15 (65 %)       | 25 | 20 (80 %)       | 53 | 31 (58 %)       | 21 | 17 (81 %)       | 0.14   |
| Number of days on vasopressors (day one to 10) | 100 | 1 (0 - 4)         | 20 | 2 (0 - 3)       | 15 | 1 (0 - 3)       | 45 | 1 (0 - 3)       | 20 | 3 (1 - 4)       | 0.20   |
| ECMO duration (days)                           | 122 | 20 (11 - 30)      | 23 | 10 (7 - 16)     | 25 | 26 (16 - 36)    | 53 | 21 (12 - 30)    | 21 | 23 (15 - 29)    | 0.0005 |
| Mechanical Ventilation duration (days)         | 122 | 33 (23 - 50)      | 23 | 25 (18 - 35)    | 25 | 44 (26 - 61)    | 53 | 34 (24 - 44)    | 21 | 34 (28 - 50)    | 0.014  |
| in-ICU length of stay (days)                   | 122 | 38 (27 - 52)      | 23 | 34 (21 - 45)    | 25 | 45 (28 - 62)    | 53 | 38 (28 - 49)    | 21 | 36 (28 - 54)    | 0.22   |
| 6-month deaths                                 | 122 | 58 (48 %)         | 23 | 4 (17 %)        | 25 | 16 (64 %)       | 53 | 28 (53 %)       | 21 | 10 (48 %)       | 0.009  |

*Values are expressed as median [IQR] or as number and frequency. n: available data*

*COVID-19: Coronavirus disease 2019; Crs: static respiratory compliance; ECMO: extracorporeal membrane oxygenation; FiO<sub>2</sub>: inspired oxygen fraction; ICU: intensive care unit; PaO<sub>2</sub>: arterial oxygen tension; PEEP: positive end-expiratory pressure; SAPS2: simplified acute physiology score*

According to the French National Institute for Statistics and Economic Studies, the distribution of COVID-19 waves in France was decided as follows:

Wave 1: From March 2, 2020, to July 6, 2020

Wave 2: From July 7, 2020, to January 4, 2021

Wave 3: From January 5, 2021, to July 5, 2021

Wave 4: From July 6, 2021, to December 31, 2021



Table S3: univariate Cox models for 180-day mortality with time-fixed and time-dependent variables.

| Variables                                                              | HR 95%CI          | p       |
|------------------------------------------------------------------------|-------------------|---------|
| <b>Demographics and medical history</b>                                |                   |         |
| <i>Time-fixed variables</i>                                            |                   |         |
| Age (per 5 years)                                                      | 1.4 (1.2-1.6)     | 0.00033 |
| Body mass index (per 5 Kg/m <sup>2</sup> )                             | 0.93 (0.77-1.1)   | 0.45    |
| Male gender (%)                                                        | 1.3 (0.75-2.4)    | 0.34    |
| Hypertension (yes/no)                                                  | 1 (0.61-1.7)      | 0.93    |
| Diabetes mellitus (yes/no)                                             | 1.6 (0.93-2.8)    | 0.086   |
| Cardiac disease (yes/no)                                               | 1.3 (0.55-3)      | 0.56    |
| Lung disease (yes/no)                                                  | 1.6 (0.93-2.8)    | 0.085   |
| Renal disease (yes/no)                                                 | 0.75 (0.27-2.1)   | 0.58    |
| Immunosuppression (yes/no)                                             | 0.99 (0.45-2.2)   | 0.97    |
| <b>characteristics pre-vvECMO implantation</b>                         |                   |         |
| <i>Time-fixed variables</i>                                            |                   |         |
| Delay from first symptoms to ECMO implantation (per 2 days)            | 1 (0.98-1)        | 0.67    |
| Length of mechanical ventilation before ECMO implantation (per 2 days) | 1.1 (0.97-1.1)    | 0.22    |
| Prone positioning (yes/no)                                             | 2.7 (0.38-20)     | 0.32    |
| Tocilizumab for COVID (yes/no)                                         | 1.5 (0.76-3)      | 0.25    |
| Mobile ECMO assistance (yes/no)                                        | 1 (0.6-1.7)       | 0.99    |
| Ventilator acquired pneumonia (yes/no)                                 | 1.9 (1.1-3.3)     | 0.028   |
| Shock state (yes/no)                                                   | 0.69 (0.41-1.2)   | 0.18    |
| Wave of pandemic 1 versus 2-3-4 (yes/no)                               | 3.81 (1.38-10.54) | 0.01    |
| SAPS2 score (per 5 points)                                             | 1.1 (1-1.2)       | 0.027   |
| <b>characteristics post-vvECMO implantation</b>                        |                   |         |
| <i>Time-fixed variables</i>                                            |                   |         |
| Lactate (per 0.5 mmol/l) at day 1                                      | 1.1 (0.95-1.2)    | 0.27    |
| PaO <sub>2</sub> /FiO <sub>2</sub> (per 10) at day 1                   | 1 (0.97-1)        | 0.95    |
| Early right ventricular failure                                        | 0.59 (0.18-1.9)   | 0.37    |
| Shock state between day 1 and 10 (yes/no)                              | 1.5 (0.83-2.7)    | 0.18    |

| <b>Variables</b>                                               | <b>HR 95%CI</b>  | <b>p</b> |
|----------------------------------------------------------------|------------------|----------|
| Shock state: number of days under vasopressor from day 1 to 10 | 1 (0.86-1.3)     | 0.67     |
| Delta weight between day 1 to 10 (per 2 kg)                    | 1.1 (0.97-1.2)   | 0.18     |
| <i>Time-dependent variables</i>                                |                  |          |
| Crs (per 5 ml/cmH <sub>2</sub> O) from day 1 to 10             | 0.59 (0.49-0.71) | <0.0001  |
| Respiratory rate (per 5 c/min) from day 1 to 10                | 0.62 (0.49-0.77) | <0.0001  |
| ECMO flow (per 0.5 L/min) from day 1 to 10                     | 1.24 (1.11-1.39) | 0.0001   |
| Sweep gas flow (L/min) from day 1 to 10                        | 1.21 (1.12-1.32) | <0.0001  |

\*wave 1 was compared to the 3 others

*Crs: static respiratory compliance; ECMO: extracorporeal membrane oxygenation; FiO<sub>2</sub>: inspired oxygen fraction; ICU: intensive care unit; PaO<sub>2</sub>: arterial oxygen tension; PEEP: positive end-expiratory pressure; SAPS2: simplified acute physiology score*
